# Supplementary material for: Synthetic structure effect of CuO/NaZSM-5 on the catalytic oxidation of chlorinated aromatic hydrocarbon
Source: Royal Society of Chemistry journal article supplement (doi:10.1039/d4dt03299c), 2025-01-01
Supplement: d4dt03299c1.pdf [file d4dt03299c1.pdf]

## Supporting Information (SI)

### Synthetic Structure Effect of CuO/NaZSM-5 on Catalytic Oxidation of Chlorinated Aromatic Hydrocarbon

Man Xie<sup>a</sup>, Jiasheng Wang<sup>a</sup>, Hangyu Zhou<sup>a</sup>, Hao Zhang<sup>a</sup>, Pengfei Sun, Xiaoping Dong\*

<sup>a</sup> College of Chemistry and Chemical Engineering, Zhejiang Sci-Tech University, Hangzhou 310018, China

<sup>b</sup> Key Laboratory of Surface & Interface Science of Polymer Materials of Zhejiang Province, Zhejiang Sci-Tech University, Hangzhou 310018, China.

\* Corresponding author.

E-mail address: xpdong@zstu.edu.cn

#### 1. Supplementary Figure

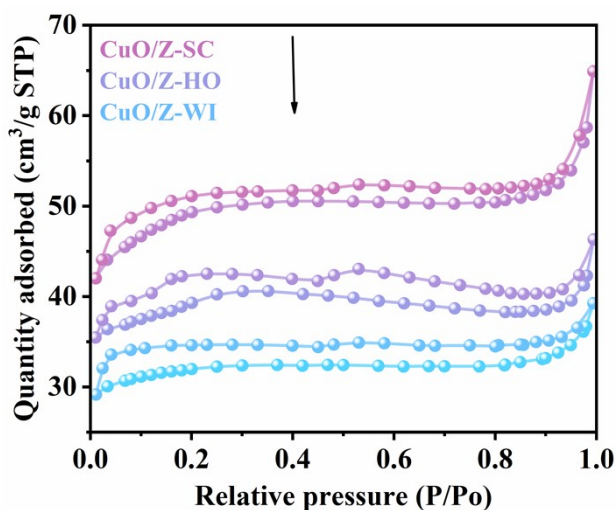

Fig. S1. N<sub>2</sub>- adsorption-desorption isotherms of CuO/Z-SC, CuO/Z-HO and CuO/Z-WI.

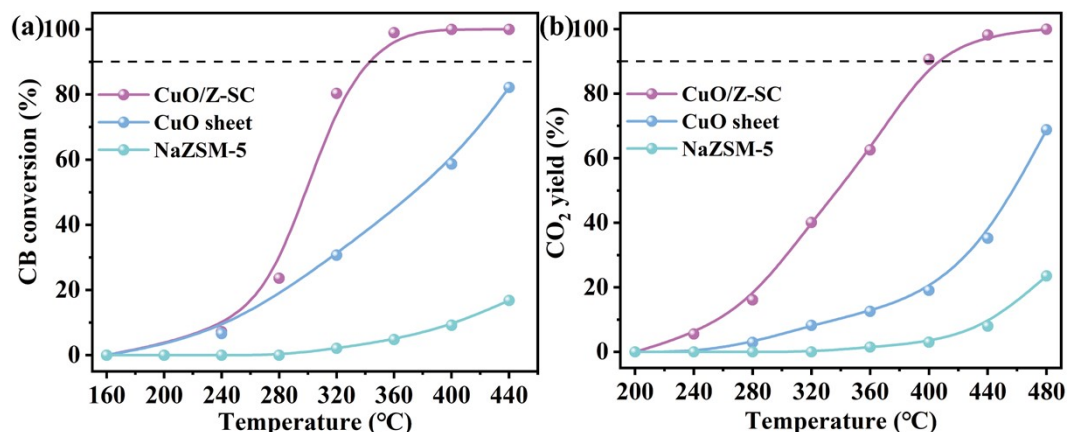

Fig. S2. Conversion of CB (a) and CO<sub>2</sub> yield (b). (Conditions: CB concentration of 500 ppm, mass flow rate of 33,000 mL/(g·h), 20% O<sub>2</sub>, 80% N<sub>2</sub> and catalyst amount of 200 mg).

\* Corresponding author.

E-mail address: xpdong@zstu.edu.cn
